# Supplementary material for: Systematic literature review of burden of illness in chronic inflammatory demyelinating polyneuropathy (CIDP)
Source: Springer Nature journal article supplement (doi:10.1007/s00415-020-09998-8), 2020-06-24
Supplement: MOESM1 [file 18115812]

## Electronic Supplementary Material

### Online Resource 1

**Table 1. MEDLINE & EMBASE Search Terms**

| Search                   | Query                                                                                                                                                                                                                                                                                                                                                                                                                                                                                                                                                                                                                                                                                                                                                                                                                                          | Items found |
|--------------------------|------------------------------------------------------------------------------------------------------------------------------------------------------------------------------------------------------------------------------------------------------------------------------------------------------------------------------------------------------------------------------------------------------------------------------------------------------------------------------------------------------------------------------------------------------------------------------------------------------------------------------------------------------------------------------------------------------------------------------------------------------------------------------------------------------------------------------------------------|-------------|
| <b>Epidemiology</b>      |                                                                                                                                                                                                                                                                                                                                                                                                                                                                                                                                                                                                                                                                                                                                                                                                                                                |             |
| #1                       | <p>(((((("chronic inflammatory demyelinating polyneuropathy"[Title/Abstract]) OR CIDP[Title/Abstract]) OR "chronic relapsing polyneuropathy"[Title/Abstract]) OR CRP[Title/Abstract]) OR "chronic inflammatory demyelinating polyradiculoneuropathy"[Title/Abstract]) NOT "CODP"[Title/Abstract]) NOT "Hs-CRP"[Title/Abstract]) NOT "C-reactive protein"[Title/Abstract] AND (epidemiology[MeSH Terms] OR epidemiolog*[Title/Abstract] OR incidence[Title/Abstract] OR prevalence[Title/Abstract] OR survival[Title/Abstract] OR mortality OR "risk factor" OR comorbi* OR "natural history"))</p> <p><b>Limits:</b> English, humans, adults, 10 years, dataset, guideline, meta-analysis, multi-center study, observational study, practice guideline, research support - Non-U.S. Gov't, review, systematic reviews, validation studies</p>  | 994         |
| <b>Humanistic burden</b> |                                                                                                                                                                                                                                                                                                                                                                                                                                                                                                                                                                                                                                                                                                                                                                                                                                                |             |
| #2                       | <p>(((((("chronic inflammatory demyelinating polyneuropathy"[Title/Abstract]) OR CIDP[Title/Abstract]) OR "chronic relapsing polyneuropathy"[Title/Abstract]) OR CRP[Title/Abstract]) OR "chronic inflammatory demyelinating polyradiculoneuropathy"[Title/Abstract]) NOT "CODP"[Title/Abstract]) NOT "Hs-CRP"[Title/Abstract]) NOT "C-reactive protein"[Title/Abstract] AND ("quality of life"[MeSH Terms] OR Outcomes[Title/Abstract] OR "quality of life"[Title/Abstract] OR QoL[Title/Abstract] OR HRQoL[Title/Abstract] OR patient-reported[Title/Abstract] OR productiv*[Title/Abstract] OR (humanistic[Title/Abstract] OR disease[Title/Abstract] OR patient[Title/Abstract] OR caregiver[Title/Abstract] OR psychological[Title/Abstract] OR psychosocial[Title/Abstract] OR physical[Title/Abstract] AND burden[Title/Abstract]))</p> | 556         |

|                                                  |                                                                                                                                                                                                                                                                                                                                                                                                                                                                                                                                                                                                                                                                                                                                                                                                                                                                                                                                                                                                                                                                                                                                                                                                                        |     |
|--------------------------------------------------|------------------------------------------------------------------------------------------------------------------------------------------------------------------------------------------------------------------------------------------------------------------------------------------------------------------------------------------------------------------------------------------------------------------------------------------------------------------------------------------------------------------------------------------------------------------------------------------------------------------------------------------------------------------------------------------------------------------------------------------------------------------------------------------------------------------------------------------------------------------------------------------------------------------------------------------------------------------------------------------------------------------------------------------------------------------------------------------------------------------------------------------------------------------------------------------------------------------------|-----|
|                                                  | <p><b>Limits:</b> English, humans, adults, 10 years, dataset, guideline, meta-analysis, multi-center study, observational study, practice guideline, research support - Non-U.S. Gov't, review, systematic reviews, validation studies</p>                                                                                                                                                                                                                                                                                                                                                                                                                                                                                                                                                                                                                                                                                                                                                                                                                                                                                                                                                                             |     |
| <p><b>Guidelines &amp; current treatment</b></p> |                                                                                                                                                                                                                                                                                                                                                                                                                                                                                                                                                                                                                                                                                                                                                                                                                                                                                                                                                                                                                                                                                                                                                                                                                        |     |
| #3                                               | <p>(((((("chronic inflammatory demyelinating polyneuropathy"[Title/Abstract]) OR CIDP[Title/Abstract]) OR "chronic relapsing polyneuropathy"[Title/Abstract]) OR CRP[Title/Abstract]) OR "chronic inflammatory demyelinating polyradiculoneuropathy"[Title/Abstract]) NOT "CODP"[Title/Abstract]) NOT "Hs-CRP"[Title/Abstract]) NOT "C-reactive protein"[Title/Abstract] AND ((practice guidelines as topic[MeSH Terms] OR guideline*[Title/Abstract] OR guidance[Title/Abstract] OR "European Federation of Neurological Societies/Peripheral Nerve Society"[Title/Abstract] OR "task force"[Title/Abstract] OR consensus[Title/Abstract] OR corticosteroid[Title/Abstract]) OR (dexamethasone[Title/Abstract] OR methylprednisolone[Title/Abstract] OR prednisone[Title/Abstract] OR prednisolone[Title/Abstract] OR immunoglobulin[Title/Abstract] )))</p> <p><b>Limits:</b> English, humans, adults, 10 years, dataset, guideline, meta-analysis, multi-center study, observational study, practice guideline, research support - Non-U.S. Gov't, review, systematic reviews, validation studies, clinical trial - phase III, clinical trial - phase IV, pragmatic clinical trial, randomized controlled trial</p> | 566 |
| <p><b>Economic burden</b></p>                    |                                                                                                                                                                                                                                                                                                                                                                                                                                                                                                                                                                                                                                                                                                                                                                                                                                                                                                                                                                                                                                                                                                                                                                                                                        |     |
| #4                                               | <p>(((((("chronic inflammatory demyelinating polyneuropathy"[Title/Abstract]) OR CIDP[Title/Abstract]) OR "chronic relapsing polyneuropathy"[Title/Abstract]) OR CRP[Title/Abstract]) OR "chronic inflammatory demyelinating polyradiculoneuropathy"[Title/Abstract]) NOT "CODP"[Title/Abstract]) NOT "Hs-CRP"[Title/Abstract]) NOT "C-reactive protein"[Title/Abstract] AND ("Economic burden"[Title/Abstract] OR costs[Title/Abstract] OR "healthcare utili*"[Title/Abstract] OR "resource utili*"[Title/Abstract] OR hospitaliz*[Title/Abstract] OR hospitalis*[Title/Abstract] OR length of stay[Title/Abstract] OR cost[Title/Abstract] OR ((inpatient OR outpatient OR emergency department) AND (days OR visits))))</p>                                                                                                                                                                                                                                                                                                                                                                                                                                                                                         | 228 |

|  |                                                                                                                                                                                                                                     |  |
|--|-------------------------------------------------------------------------------------------------------------------------------------------------------------------------------------------------------------------------------------|--|
|  | <b>Limits:</b> English, humans, adults, 10 years, dataset, guideline, meta-analysis, multi-center study, observational study, practice guideline, research support - Non-U.S. Gov't, review, systematic reviews, validation studies |  |
|--|-------------------------------------------------------------------------------------------------------------------------------------------------------------------------------------------------------------------------------------|--|

The search was conducted on May 9, 2019
