# Supplementary material for: Systematic literature review of burden of illness in chronic inflammatory demyelinating polyneuropathy (CIDP)
Source: Springer Nature journal article supplement (doi:10.1007/s00415-020-09998-8), 2020-06-24
Supplement: MOESM4 [file 18115812]

## Electronic Supplementary Material

### Online Resource 4

**Table 3. Summary of data identified related to economic burden of CIDP**

| Publication                          | Country | Patient sample                                                                                                                                                                                         | Total cost of illness | Direct costs | Indirect costs | Health resource utilisation                                                                                                                                                                                                           |
|--------------------------------------|---------|--------------------------------------------------------------------------------------------------------------------------------------------------------------------------------------------------------|-----------------------|--------------|----------------|---------------------------------------------------------------------------------------------------------------------------------------------------------------------------------------------------------------------------------------|
| Alexandrescu <i>et al.</i> 2014 [24] | UK      | <p>n=15</p> <ul style="list-style-type: none"> <li>Sample derived from the UKROC database, which collates the national clinical dataset for in-patient specialist rehabilitation in England</li> </ul> | NR                    | NR           | NR             | <p><b>Estimated care requirements</b></p> <p><b>Upon patient admission to neurorehabilitation centres (hours/week, mean): 35.0</b></p> <p><b>Upon patient discharge from neurorehabilitation centres (hours/week, mean): 22.5</b></p> |

| Publication                          | Country | Patient sample                                                                                                                                                             | Total cost of illness                                                                                                                                                                                                                                         | Direct costs                                                                  | Indirect costs | Health resource utilisation |
|--------------------------------------|---------|----------------------------------------------------------------------------------------------------------------------------------------------------------------------------|---------------------------------------------------------------------------------------------------------------------------------------------------------------------------------------------------------------------------------------------------------------|-------------------------------------------------------------------------------|----------------|-----------------------------|
| Krishnarajah <i>et al.</i> 2017 [59] | US      | <p>Cases: n=790</p> <p>Controls: n=790</p> <ul style="list-style-type: none"> <li>Sample derived from QuintilesIMS PharMetrics Plus Health Plan Claims Database</li> </ul> | <p><b>Median, CIDP vs. controls without CIDP</b></p> <p><b>Total healthcare costs six-months prior to diagnosis:</b> \$4,751 vs. \$2,209 (p&lt;0.0001)</p> <p><b>Total healthcare costs two years after diagnosis:</b> \$47,827 vs. \$5,823 (p&lt;0.0001)</p> | <p><b>CIDP-related therapy costs (% of total healthcare costs):</b> 51.4%</p> | NR             | NR                          |

| Publication                    | Country | Patient sample                                                                                                                                                                                                          | Total cost of illness                                                                                                         | Direct costs                                                                                                                                                                                                                                                                                                                                                                                                                                                                                                                                                                                                                                                                                                            | Indirect costs | Health resource utilisation                                                                                                                                                                                                                                                                                                                                                                                                                                                                                           |
|--------------------------------|---------|-------------------------------------------------------------------------------------------------------------------------------------------------------------------------------------------------------------------------|-------------------------------------------------------------------------------------------------------------------------------|-------------------------------------------------------------------------------------------------------------------------------------------------------------------------------------------------------------------------------------------------------------------------------------------------------------------------------------------------------------------------------------------------------------------------------------------------------------------------------------------------------------------------------------------------------------------------------------------------------------------------------------------------------------------------------------------------------------------------|----------------|-----------------------------------------------------------------------------------------------------------------------------------------------------------------------------------------------------------------------------------------------------------------------------------------------------------------------------------------------------------------------------------------------------------------------------------------------------------------------------------------------------------------------|
| Divino <i>et al.</i> 2018 [56] | US      | <p>n=790</p> <ul style="list-style-type: none"> <li>Sample derived from US managed care enrollees identified in IQVIA RWD Adjudicated Claims database based on &gt;1 medical claim with a diagnosis for CIDP</li> </ul> | <p><b>Mean, CIDP vs. controls without CIDP (p&lt;0.0001)</b></p> <p><b>Two-year total costs:</b><br/>\$116,330 vs. 15,586</p> | <p><b>Mean, CIDP vs. controls without CIDP (p&lt;.00001)</b></p> <ul style="list-style-type: none"> <li><b>Outpatient Pharmacy 2-year costs:</b> \$11,186 vs. \$3,953</li> <li><b>Medical 2-year costs:</b> \$105,144 vs. \$11,633</li> <li><b>Inpatient 2-year costs:</b> \$16,357 vs. \$2,862</li> <li><b>ER 2-year costs:</b> \$1,188 vs. \$468</li> <li><b>Physician office 2-year costs:</b> \$5,122 vs. \$2,208</li> <li><b>Outpatient surgery 2-year costs:</b> \$3,204 vs. \$1,157</li> <li><b>Lab/pathology 2-year costs:</b> \$2,907 vs. \$1,903</li> <li><b>Outpatient ancillary, radiology and HCPCS drugs 2-year costs:</b> \$76,366 vs. \$4,292</li> </ul> <p><b>Total CIDP therapy:</b><br/>\$59,619</p> | NR             | <p><b>CIDP patients vs. controls without CIDP (mean), (p&lt;0.0001)</b></p> <ul style="list-style-type: none"> <li><b>≥ 1 Hospitalisation:</b> 26.2% vs. 9.0%</li> <li><b>Outpatient prescription fills:</b> 62.8 vs. 32.0</li> <li><b>Physician office visits:</b> 34.7 vs. 13.0</li> <li><b>ER visit:</b> 42.2% vs. 21.9%</li> <li><b>Outpatient surgical visit:</b> 77.1% vs. 45.9%</li> <li><b>≥1 neurologist office visit:</b> 67.0% vs. 3.9%</li> <li><b>Physical therapy visits:</b> 14.7% vs. 2.8%</li> </ul> |

| Publication                     | Country | Patient sample                                                                                                                                                                                                                                                                                                                      | Total cost of illness | Direct costs                                                                                                                                                                                                                                                                                                                                                                                                                                                                                                                                                                                                                                                                                                                                                                                                                                                                                             | Indirect costs | Health resource utilisation                                                                                                                                                                                                               |
|---------------------------------|---------|-------------------------------------------------------------------------------------------------------------------------------------------------------------------------------------------------------------------------------------------------------------------------------------------------------------------------------------|-----------------------|----------------------------------------------------------------------------------------------------------------------------------------------------------------------------------------------------------------------------------------------------------------------------------------------------------------------------------------------------------------------------------------------------------------------------------------------------------------------------------------------------------------------------------------------------------------------------------------------------------------------------------------------------------------------------------------------------------------------------------------------------------------------------------------------------------------------------------------------------------------------------------------------------------|----------------|-------------------------------------------------------------------------------------------------------------------------------------------------------------------------------------------------------------------------------------------|
| Guptill <i>et al.</i> 2014 [57] | US      | n=73<br><ul style="list-style-type: none"> <li>• Sample included patients with a diagnosis of CIDP between January 1, 2011, and December 31, 2011 whose primary health plan was eligible for the AHS care management program</li> <li>• Patients must have had at least 1 health insurance claim during the study period</li> </ul> | NR                    | <p><b>Mean cost, per patient per year</b></p> <ul style="list-style-type: none"> <li>• <b>Health plan paid costs:</b> \$56,953 (95% CI \$36,457–77,450)</li> <li>• <b>Medical costs (mean):</b> \$25,546 (95% CI \$11,419–\$38,690)</li> <li>• <b>Pharmacy claims (mean):</b> \$31,899 (95% CI \$17,197–\$46,600)</li> <li>• <b>Nerve conduction and EMG studies (mean):</b> \$913</li> <li>• <b>Healthcare costs women vs. men (mean):</b> \$47,094 vs. \$64,648 (P=0.38)</li> <li>• <b>Health plan paid costs for patients treated with IVIG:</b> \$108,016</li> <li>• <b>Cost per IVIG infusion:</b> \$8,598 ± \$476</li> </ul> <p><b>Costs for IVIG administration according to setting</b></p> <ul style="list-style-type: none"> <li>• <b>At home:</b> \$9,720</li> <li>• <b>Outpatient:</b> \$9,718</li> <li>• <b>Clinic:</b> \$2,610</li> </ul> <p><b>Distribution of health plan costs:</b></p> | NR             | <p><b>IVIG infusion setting:</b></p> <ul style="list-style-type: none"> <li>• <b>Home:</b> 72%</li> <li>• <b>Physician office:</b> 16%</li> <li>• <b>Outpatient hospital:</b> 11%</li> <li>• <b>Other place of service:</b> 1%</li> </ul> |

| Publication | Country | Patient sample | Total cost of illness | Direct costs                                                                                                                                                                                                                                                                                                                                                                                     | Indirect costs | Health resource utilisation |
|-------------|---------|----------------|-----------------------|--------------------------------------------------------------------------------------------------------------------------------------------------------------------------------------------------------------------------------------------------------------------------------------------------------------------------------------------------------------------------------------------------|----------------|-----------------------------|
|             |         |                |                       | <ul style="list-style-type: none"> <li>• <b>Injectable drugs billed using HCPCS codes:</b><br/>51%</li> <li>• <b>Inpatient hospital:</b> 18%</li> <li>• <b>Outpatient hospital:</b> 16%</li> <li>• <b>Physician office:</b> 3%</li> <li>• <b>ER:</b> 1%</li> <li>• <b>Other:</b> 2%</li> <li>• <b>Prescription pharmacy billed using NDC codes:</b><br/>6%</li> <li>• <b>Home:</b> 3%</li> </ul> |                |                             |

| Publication                       | Country | Patient sample                                                                                                                                                                                                                                         | Total cost of illness                                                                                                                                                                                                        | Direct costs | Indirect costs | Health resource utilisation |
|-----------------------------------|---------|--------------------------------------------------------------------------------------------------------------------------------------------------------------------------------------------------------------------------------------------------------|------------------------------------------------------------------------------------------------------------------------------------------------------------------------------------------------------------------------------|--------------|----------------|-----------------------------|
| Le Masson <i>et al.</i> 2018 [55] | France  | <p><b>CIDP:</b> n=8</p> <p><b>LSS:</b> n=7</p> <ul style="list-style-type: none"> <li>Patients currently treated with IVIG in a hospital outpatient setting were recruited for a before–after study from two tertiary referral care centres</li> </ul> | <p><b>Annual costs (extrapolated)</b></p> <p><b>Typical CIDP:</b></p> <p>€102,296 (Hospital IVIGs)</p> <p>€47,823 (Home IVIGs)</p> <p><b>Atypical CIDP:</b></p> <p>€106,867 (Hospital IVIGs)</p> <p>€62,592 (Home IVIGs)</p> | NR           | NR             | NR                          |

| Publication                          | Country | Patient sample                                                                                                                                            | Total cost of illness                                     | Direct costs                                                                                                                                                                                                                                                                                                 | Indirect costs                                                                                                                                            | Health resource utilisation                                                                                                                                                                                                                                                                                                                                                                                                                                                                                                                                                        |
|--------------------------------------|---------|-----------------------------------------------------------------------------------------------------------------------------------------------------------|-----------------------------------------------------------|--------------------------------------------------------------------------------------------------------------------------------------------------------------------------------------------------------------------------------------------------------------------------------------------------------------|-----------------------------------------------------------------------------------------------------------------------------------------------------------|------------------------------------------------------------------------------------------------------------------------------------------------------------------------------------------------------------------------------------------------------------------------------------------------------------------------------------------------------------------------------------------------------------------------------------------------------------------------------------------------------------------------------------------------------------------------------------|
| Mahdi-Rogers <i>et al.</i> 2014 [25] | UK      | n=43<br><ul style="list-style-type: none"> <li>An epidemiological study in the administrative areas of South East London, Kent and East Sussex</li> </ul> | <b>Annual costs per patient (mean):</b><br>Total: £22,086 | <b>Estimated UK annual economic costs:</b> <ul style="list-style-type: none"> <li><b>Hospital services:</b> £4,845,301</li> <li><b>Primary care services:</b> £319,451</li> <li><b>Social services:</b> £4,327,290</li> <li><b>Treatment:</b> £17,489,517</li> <li><b>Investigation:</b> £174,701</li> </ul> | <b>Indirect cost (i.e. loss of productivity):</b> £5,815<br><br><b>Overall economic cost:</b> £36,0860,892<br><br><b>Loss of productivity:</b> £9,704,631 | <b>Six-month usage of healthcare and social services (% patients):</b> <ul style="list-style-type: none"> <li><b>Hospital out-patient:</b> 62.8%</li> <li><b>Hospital in-patient or day case:</b> 39.5%</li> <li><b>Primary care (GP):</b> 69.8%</li> <li><b>Social services:</b> 48.9%</li> </ul> <b>Number of hours spent with healthcare workers (mean per month):</b> <ul style="list-style-type: none"> <li><b>Neurologist:</b> 0.40</li> <li><b>General practitioner:</b> 0.36</li> <li><b>Physiotherapist:</b> 0.27</li> <li><b>Occupational therapist:</b> 0.38</li> </ul> |

| Publication                   | Country | Patient sample                                                                                                                                                                                                    | Total cost of illness                            | Direct costs                                                                                                                                                                                                                                                                                                                                                                                                                                                                                                                                                                                                                           | Indirect costs                                                                                                                                                                                                                                                                                                                                 | Health resource utilisation |
|-------------------------------|---------|-------------------------------------------------------------------------------------------------------------------------------------------------------------------------------------------------------------------|--------------------------------------------------|----------------------------------------------------------------------------------------------------------------------------------------------------------------------------------------------------------------------------------------------------------------------------------------------------------------------------------------------------------------------------------------------------------------------------------------------------------------------------------------------------------------------------------------------------------------------------------------------------------------------------------------|------------------------------------------------------------------------------------------------------------------------------------------------------------------------------------------------------------------------------------------------------------------------------------------------------------------------------------------------|-----------------------------|
| Mengel <i>et al.</i> 2018 [9] | Germany | n=108<br><ul style="list-style-type: none"> <li>Patients who were treated in specialized neuroimmunology outpatient clinics in Marburg, Göppingen, and Düsseldorf at the time of or prior to the study</li> </ul> | <b>Annual total cost (extrapolated): €45,000</b> | <b>Direct 3-month costs (mean per patient)</b><br><ul style="list-style-type: none"> <li><b>Total:</b> €9,423 (83% of all costs)</li> <li><b>Inpatient care:</b> €721</li> <li><b>Outpatient care:</b> €153</li> <li><b>Stationary rehabilitation:</b> €35</li> <li><b>Ancillary therapy:</b> €121</li> <li><b>Special equipment:</b> €20</li> <li><b>Drugs:</b> €7,897 <ul style="list-style-type: none"> <li>- IVIG: €7,606</li> <li>- Cyclophosphamide: €4</li> <li>- Rituximab: €34</li> <li>- Azathioprine: €4</li> <li>- Mycophenolate mofetil: €30</li> <li>- Glucocorticoids: €4</li> <li>- Other: €115</li> </ul> </li> </ul> | <b>3-month indirect costs (mean per patient)</b><br><ul style="list-style-type: none"> <li><b>Total:</b> €1,910 (17% of total costs)</li> <li><b>Premature retirement:</b> €945</li> <li><b>Disability:</b> €276</li> <li><b>Unemployment:</b> €189</li> <li><b>Sick leave:</b> €283</li> <li><b>Reduction of labour time:</b> €217</li> </ul> | NR                          |



| Publication                    | Country | Patient sample                                                                                                                                                                                                                                                                                                | Total cost of illness | Direct costs | Indirect costs | Health resource utilisation                                                                                                                                                                         |
|--------------------------------|---------|---------------------------------------------------------------------------------------------------------------------------------------------------------------------------------------------------------------------------------------------------------------------------------------------------------------|-----------------------|--------------|----------------|-----------------------------------------------------------------------------------------------------------------------------------------------------------------------------------------------------|
| Rosier <i>et al.</i> 2018 [58] | France  | n=134<br><ul style="list-style-type: none"> <li>An e-mail invitation was sent to 411 neurologists registered on a voluntary basis both from neuromuscular reference centres and outside of those centres. The neurologists provided four patient case reports (diagnosis, follow-up and treatment)</li> </ul> | NR                    | NR           | NR             | <b>IVIG-associated resource use (% of cases):</b><br><ul style="list-style-type: none"> <li><b>Full hospitalisation:</b> 43%</li> <li><b>Day care:</b> 49%</li> <li><b>Home care:</b> 8%</li> </ul> |

AHS: Accordant Health Services; CI: Confidence interval; CIDP: Chronic inflammatory demyelinating polyneuropathy; EMG: Electromyography; ER: Emergency Room; GP: General practitioner; HCPCS: Healthcare Common Procedure Coding System; IVIG: Intravenous immunoglobulin; LSS: Lewis-Sumner syndrome; NDC: National Drug Code; NR: Not reported; RWD: Real world data; UKROC: UK Rehabilitation Outcomes Collaborative
